# Supplementary material for: Clinician and patient experiences with opportunistic offer of HPV self-testing in Aotearoa New Zealand primary care clinics: interview and survey findings
Source: Research Square preprint supplement (doi:10.21203/rs.3.rs-8092746/v1), 2025-12-01
Supplement: Supplementary file 1 [file d012adc225eb8f57c7a0d1d1.docx]

**Additional file 3.** Ethnicity, age, and HPV resultof survey respondents

|  |  | **Self-tested participants** | **Survey**  **respondents** | |
| --- | --- | --- | --- | --- |
|  |  | **N (%)** | **N (%)** | **95% CI** |
| Ethnicity | |  |  |  |
|  | Māori | 476 (13.5) | 57 (14.5) | 11.3, 18.3 |
|  | Pacific | 1409 (40.0) | 114 (28.9) | 24.7, 33.6 |
|  | Asian | 1345 (38.2) | 139 (35.3) | 30.7, 40.1 |
|  | European/Other | 294 (8.3) | 51 (12.9) | 10.0, 16.6 |
|  | Not stated | - | 33 (8.4) | 6.0, 11.6 |
| Age, years | |  |  |  |
|  | 30-39 | 1149 (32.6) | 93 (23.6) | 19.7, 28.1 |
|  | 40-49 | 985 (28.0) | 111 (28.2) | 23.9, 32.8 |
|  | 50-59 | 864 (24.5) | 103 (26.1) | 22.0, 30.7 |
|  | 60-69 | 526 (14.9) | 64 (16.2) | 12.9, 20.2 |
|  | Not stated | - | 23 (5.8) | 3.9, 8.6 |
| HPV result | |  |  |  |
|  | Not detected | 3179 (90.4)* | 282 (71.6) | 66.9, 75.8 |
|  | Detected | 336 (9.6)* | 112 (28.4) | 24.2, 33.1 |
| Total | | 3524 | 394 |  |

HPV Human papillomavirus

* Excludes n=9 HPV invalid results; total valid results n=3515

**Additional file 4****.** Amount of information, comfort level with self-testing and next test preference responses of both HPV detected and not-detected respondents by ethnicity and total number of respondents

|  |  | **Total** | | **Māori** | | **Pacific** | | **Asian** | | **European/Other** | | **Not stated** | |
| --- | --- | --- | --- | --- | --- | --- | --- | --- | --- | --- | --- | --- | --- |
|  |  | N | % | N | % | N | % | N | % | N | % | N | % |
| Amount of information | |  |  |  |  |  |  |  |  |  |  |  |  |
|  | About right | 365 | 92.6 | 54 | 94.7 | 110 | 96.5 | 129 | 92.8 | 44 | 86.3 | 28 | 84.9 |
|  | Not enough | 14 | 3.6 | <6 | - | <6 | - | <6 | - | 7 | 13.7 | <6 | - |
|  | Too much | 9 | 2.3 | <6 | - | <6 | - | <6 | - | <6 | - | <6 | - |
|  | Not stated | 6 | 1.5 | <6 | - | <6 | - | <6 | - | <6 | - | <6 | - |
| Comfort | |  |  |  |  |  |  |  |  |  |  |  |  |
|  | Very comfortable | 278 | 70.6 | 48 | 84.2 | 91 | 79.8 | 89 | 64.0 | 34 | 66.7 | 16 | 48.5 |
|  | Somewhat comfortable | 59 | 15.0 | 7 | 12.3 | 14 | 12.3 | 24 | 17.3 | 9 | 17.7 | <6 | - |
|  | Neither | 20 | 5.1 | <6 | - | <6 | - | 10 | 7.2 | <6 | - | <6 | - |
|  | Somewhat uncomfortable | 18 | 4.6 | <6 | - | <6 | - | 11 | 7.9 | <6 | - | <6 | - |
|  | Very uncomfortable | 12 | 3.1 | <6 | - | <6 | - | <6 | - | <6 | - | <6 | - |
|  | Not stated | 7 | 1.8 | <6 | - | <6 | - | <6 | - | <6 | - | <6 | - |
| Next test preference | |  |  |  |  |  |  |  |  |  |  |  |  |
|  | Do the self-test at a clinic | 147 | 37.3 | 25 | 43.9 | 47 | 41.2 | 54 | 38.9 | 15 | 29.4 | 6 | 18.2 |
|  | Mailed kit to do at home | 124 | 31.5 | 15 | 26.3 | 36 | 31.6 | 49 | 35.3 | 20 | 39.2 | <6 | - |
|  | Pick up a kit from a clinic/pharmacy | 58 | 14.7 | 9 | 15.8 | 19 | 16.7 | 16 | 11.5 | 10 | 19.6 | <6 | - |
|  | Cytology by a doctor or nurse | 25 | 6.4 | <6 | - | <6 | - | 13 | 9.4 | <6 | - | <6 | - |
|  | Other | 11 | 2.8 | <6 | - | <6 | - | <6 | - | <6 | - | <6 | - |
|  | Not stated/ don't know | 29 | 7.4 | <6 | - | <6 | - | <6 | - | <6 | - | 18 | 54.6 |
| Total |  | 394 | 100.0 | 57 | 100.0 | 114 | 100.0 | 139 | 100.0 | 51 | 100.0 | 33 | 100.0 |

To protect participant confidentiality and privacy, values of less than 6 are suppressed, as well as additional values to prevent the suppressed values from being derived.
