# Supplementary material for: Clinician and patient experiences with opportunistic offer of HPV self-testing in Aotearoa New Zealand primary care clinics: interview and survey findings
Source: Research Square preprint supplement (doi:10.21203/rs.3.rs-8092746/v1), 2025-12-01
Supplement: Supplementary file 2 [file ea6af83b2a2588b0cf25d373.docx]

**Additional file 1:** Interview schedule

**Section 1: Involvement in the study**

| ***Your role*** | GP | Nurse | | Other (specify) |
| --- | --- | --- | --- | --- |
| ***Are you a smear-taker?*** | Yes | | No | |
| ***Accredited by the study to consent women?*** | Yes | | No | |
| ***Clinic*** | _______________ | | | |

**Section 2: Offering the self-test**

We’d like to find out a bit about your experience of offering the cervical screening self-test to women when they presented to the clinic for another reason.

*In general, how receptive were women to being offered a self-test for cervical screening when they were at the clinic for another reason?*

*Did you find there were particular barriers or challenges to offering the test to women who were due? What were they?*

*In your experience did many women decline the self-test?*

*What seemed to the most common reasons for women declining the self-test?*

*What were the main reasons for women opting to take the kt home?*

*Were there any things that particularly enabled/supported the offer or uptake of the self-test in the clinic?*

**Section 3: Information for women**

In your view, after the explanation and study brochure, how good was most women’s understanding

- *of HPV testing?*
- *of the self-test (as opposed to a smear for example)?*

*Do you have any thoughts about the main information needs for women around HPV self-testing, or how well they were met by the information in the study brochure and instructions?*

**Section 4: Results follow-up for women**

In the study, women with positive HPV results had results communicated and followed up by the study nurses.

*Do you have any thoughts about the advantages or disadvantages of having results followed up by a specialised cervical screening centre?*

*What was your experience of liaising with the study nurses about eligibility or follow up for women?*

**Section 5: Other comments**

*Is there any other information or feedback you’d like to provide about the offer, training and follow up used in the study?*

**Section 6: Demographics**

**What is your gender?**

|  | Male |
| --- | --- |
|  | Female |
|  | Gender diverse |
|  | Prefer not to answer |

**What ethnic groups do you belong to?** Tick the box or boxes that apply to you.

|  | New Zealand European |
| --- | --- |
|  | Māori |
|  | Samoan |
|  | Cook Island Maori |
|  | Tongan |
|  | Niuean |
|  | Chinese |
|  | Indian |
|  | Other e.g. Dutch, Japanese, Tokelauan;  Please state_____________________ |

**What age group are you? (optional)**

|  | 20-29 |
| --- | --- |
|  | 30- 39 |
|  | 40-49 |
|  | 50-59 |
|  | 60+ |

**Supplementary material 2.** Survey questions

Q1 Where were you offered the HPV self-test?

- At my GP clinic when I came in for something else
- I got a text or call saying I could get it from the clinic
- I got a text or call saying I could get it mailed out to my home
- Other (please specify) ________________________________________________

Q2 We'd like to know what you thought of the information you were given about the HPV self-test for cervical screening. Please select the best option.

- Not enough information
- The information was about right
- Too much information

Q2A What else would you have liked to know about the HPV self-test for cervical screening?

________________________________________________________________

Q3 How comfortable do you feel about the decision you made to have the self-test for cervical screening?

- Very uncomfortable
- Somewhat uncomfortable
- Neither comfortable nor uncomfortable
- Somewhat comfortable
- Very comfortable

Q3A What are your reasons for feeling uncomfortable about your decision to have the self-test?

________________________________________________________________

Q4 When you are next due for cervical screening, would you prefer to (pick one)

- Get a self-test kit in the mail, to do at home
- Go to a clinic (such as your family doctor) to do in the clinic
- Pick up a kit in the clinic to do the self-test at home
- Have a doctor or nurse take the test
- Pick up a kit from a pharmacy, to do at home
- Don't know/can't say
- Other (please specify) ________________________________________________

Q5 Is there anything else you'd like to tell us about your experience of being offered the self-test for cervical screening?

Q6 Which ethnic group do you belong to

- New Zealand European
- Māori
- Samoan
- Cook Island Māori
- Tongan
- Niuean
- Chinese
- Indian
- Other eg Dutch, Japanese, Tokelauan; please state __________

Q7  What is your age in years?

- 30-39
- 40-49
- 50-59
- 60-69

Q8 If you have questions or feedback on the self-test or your experience of being involved in this study, feel free to contact a study nurse: Phone: 021 227 1360 Email: HPV.study@waitematadhb.govt.nz

Additional survey questions for women with HPV detected test results

Q4 Our cervical screening nurse recently contacted you about your HPV self-test result. How do you rate your understanding of what a positive HPV test result means?

- Not good understanding
- Neutral
- Good understanding

Q4A What else would you like to know about your positive HPV test result?

________________________________________________________________

Q5 How worried do you feel about your recent screening result?

- Very worried
- A bit worried
- Neutral
- Mostly OK
- Not at all worried

Q5A What is the main reason for your worry about your result?

________________________________________________________________

Q6 How clear do you feel about what happens next in following up your HPV test result?

- Extremely unclear
- Somewhat unclear
- Neither clear nor unclear
- Somewhat clear
- Extremely clear

Q6A What else would you have liked to have known about cervical screening follow up?

________________________________________________________________

Q7 How comfortable do you feel about attending a follow up smear (or colposcopy)?

- Very uncomfortable
- A bit uncomfortable
- Neither comfortable nor uncomfortable
- Reasonably comfortable
- Very comfortable

Q7A What would help you to attend a follow up smear or colposcopy?

- More information about what to expect
- A trusted person to go with me
- Help with transport or parking
- Help with child care
- Other (please specify) ________________________________________________
